# Supplementary material for: Study of heterogeneous chemistry and photochemistry of single sea-spray aerosols containing Hg(ii) in air using optical trapping – Raman spectroscopy
Source: Royal Society of Chemistry journal article supplement (doi:10.1039/d4ea00053f), 2024-01-01
Supplement: d4ea00053f2.pdf [file d4ea00053f2.pdf]

Table S1. Raman bands and band assignments.

| Bands                      | Assignments                                             |
|----------------------------|---------------------------------------------------------|
| 166 $\text{cm}^{-1}$       | $\text{Hg}_2\text{Cl}_2$                                |
| 185 $\text{cm}^{-1}$       | O-H $\cdots$ O stretching vibrations                    |
| 206 $\text{cm}^{-1}$       | hydrogen bond stretch                                   |
| 279 $\text{cm}^{-1}$       | liberational (rotational) modes of $\text{H}_2\text{O}$ |
| 314 $\text{cm}^{-1}$       | $\text{HgCl}_2$                                         |
| 380 $\text{cm}^{-1}$       | $\text{HgCl}_2$                                         |
| 482 $\text{cm}^{-1}$       | $\nu_4 (\text{ClO}_3^-)$                                |
| 621 $\text{cm}^{-1}$       | $\nu_2 (\text{ClO}_3^-)$                                |
| 979 $\text{cm}^{-1}$       | $\nu_1 (\text{ClO}_3^-)$                                |
| 1023 $\text{cm}^{-1}$      | $\nu_3 (\text{ClO}_3^-)$                                |
| 1124 $\text{cm}^{-1}$      | $\text{ClO}_4^-$                                        |
| 1550 $\text{cm}^{-1}$      | $\text{O}_2$                                            |
| 1630 $\text{cm}^{-1}$      | OH-bending vibrations                                   |
| 2330 $\text{cm}^{-1}$      | $\text{N}_2$                                            |
| 2930 $\text{cm}^{-1}$      | $\text{H}_2\text{O}_2$                                  |
| 2900-3600 $\text{cm}^{-1}$ | OH-stretching mode                                      |

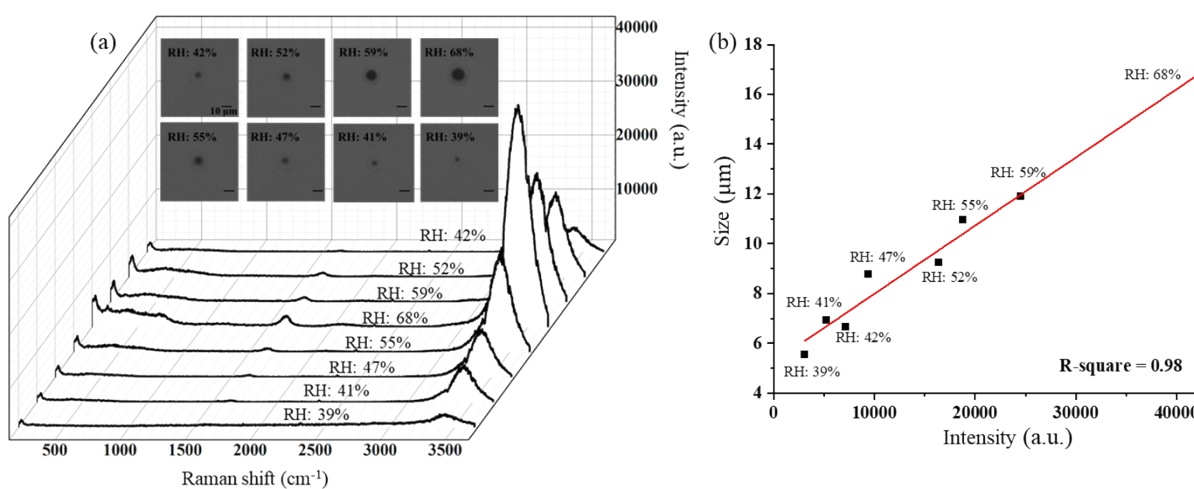

Figure S1. (a) Single-particle Raman spectra of the sea spray aerosol trapped in air under the RH of 39% - 68%. (b) A relationship between the intensity of the Raman band at  $3430 \text{ cm}^{-1}$  and the size of the trapped droplet.

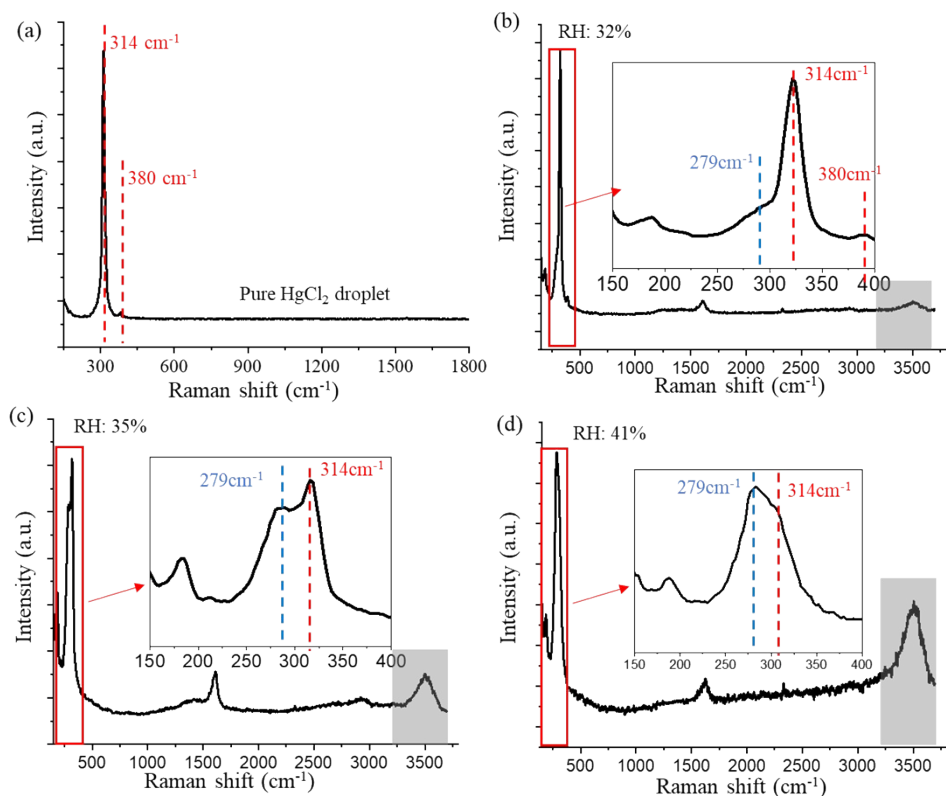

Figure S2. Single-particle Raman spectra of (a) pure  $\text{HgCl}_2$  droplet; (b), (c), and (d) spectra of SSAs containing  $\text{Hg(II)}$  trapped in a dry environment under different RH. The inset figure shows the Raman spectra with high resolution in the region of  $150 - 400\text{ cm}^{-1}$ .

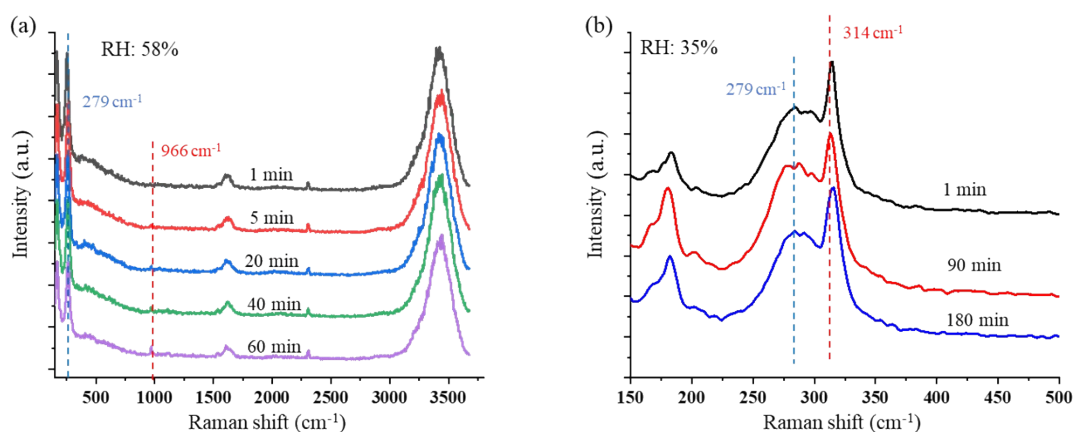

Figure S3. Raman band variations are shown by the time-resolved Raman spectra as a SSA particle exposed to  $\text{O}_3$  of 1000 ppm (a) with RH of 58%, (b) with RH of 35%.

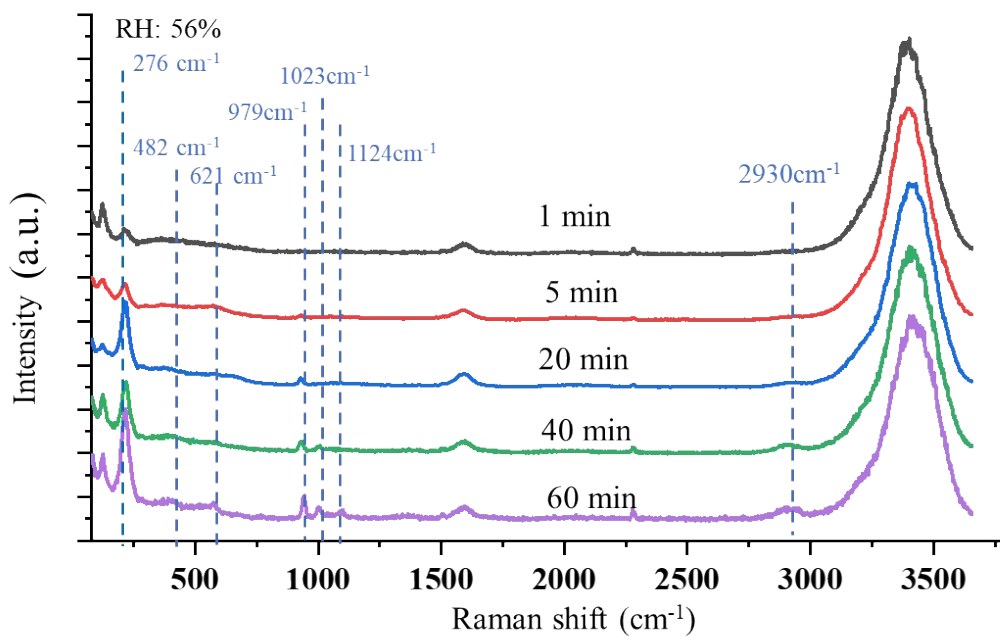

Figure S4. Raman band variation shown by the time-resolved Raman spectra indicates the formation of  $\text{ClO}_3^-$  and  $\text{ClO}_4^-$  as the SSA containing Hg(II) trapped under UVC radiation with RH of 56%.
